# Supplementary material
Source: publisher figshare collection journal article supplement (https://gsajournals.figshare.com/ndownloader/files/13549979)
Supplement: Supplementary file 1 [file 13549979]

**Table S2**

**Primer sets for ChIP-qPCR and 2-D gel**

| Primer name | Primer sequence 5’-3’ | Purpose |
| --- | --- | --- |
| CEN3 For | CCCTTCCGCTTATAGTACAGTACCTATAC | Figure 1&3 |
| CEN3 Rev | CTTCCACCAGTAAACGTTTCATATATCCATTC | Figure 1&3 |
| CEN6 For | CTAGAGGATAGAAGCGTTATGGAACCTGTCG | Figure 1 |
| CEN6 Rev | GTCGGTCGTCCAATATCATCGTAAACGTG | Figure 1 |
| CEN11 For | AGTTTACTCTCCTTTCTATGTGTATTTG | Figure 1&3 |
| CEN11 Rev | CTGCATTTATCTTTCTCTTGAACCGTAAATA | Figure 1&3 |
| CEN12 For | ACTTGTAGTACGAGGTTAACATAAGAAAGAAAGAG | Figure 1&3 |
| CEN12 Rev | GTTGAATATTTGAAGTACACACCCGCGTAAAGAG | Figure 1&3 |
| CEN13 For | ATCACATGACTACCTAACAAAATATTTATTTTT | Figure 1 |
| CEN13 Rev | ATTTAAAGTTCGGAACGCATACACATTAAA | Figure 1 |
| CEN14 For | CCGCAATTAATTGAGTTGTTGTGAAATG | Figure 1 |
| CEN14 Rev | CCACATTAATATAATTTCTTAGTTCGGC | Figure 1 |
| Ectopic CEN7 For | TGTAGTTCATGGAAATTTGCTTCTTGAGC | Figure 2 |
| Ectopic CEN7 Rev | GTACTGTGCGCGATGACGTTAGAG | Figure 2 |
| tDNA-ala - tA(AGC)F - ChVI, For | GGGAAAGATTGTACGGGAAATG | Figure 2* |
| tDNA-ala - tA(AGC)F - ChVI, Rev | ACCTGTATCATTTCTGTTTGGAAG | Figure 2* |
| tDNA-tyr - tY(GUA)F1 - ChVI, For | CCTCTGCGTCTCATTGGAAGAAG | Figure 2* |
| tDNA-tyr - tY(GUA)F1 - ChVI, Rev | GACCAACCAAATCAATAATAAAATTCGGC | Figure 2* |
| tDNA-gly – ChX, For | CTGTACACATAATTGACACGTTTAAC | Figure 2* |
| tDNA-gly – ChX, Rev | ACTTCGTCCCAATCCTTTATTCC | Figure 2* |
| Tel VI-R, For | TTTAACGGTGATTATTAGGTGGATTTTATATTAGTCTAC | Figure 2** |
| Tel VI-R, Rev | CTTCACTCCATTGCGCCCCATG | Figure 2** |
| YBL028C – ChII, For | TCTCGTCGACATCCATGTCAATTCC | Control site* |
| YBL028C – ChII, Rev | GACACTGATGACAAACCAAGAGTTCA | Control site* |
| CEN11 VPS1 For | AACAAGCTTCAGGACGCTTT | Figure 4 |
| CEN11 VPS1 Rev | GGAGACGATTTGACTAGCGTT | Figure 4 |
| CEN6 DEG1 For | AGCGATTTCAACAGGTACCA | Figure 4 |
| CEN6 DEG1 Rev | AACAACTTCGACAGGTTCCA | Figure 4 |

* These primer sets were used in (Tran *et al.* 2017).

**This primer set was used in (Fisher *et al.* 2004).
